# Supplementary material for: Research Paper: Detecting climatically driven phylogenetic and morphologicaldivergence among spruce species ( Picea ) worldwide
Source: Copernicus journal article supplement (doi:10.5194/bg-2016-465), 2016-11-02
Supplement: Supplementary file 1 [file bg-2016-465-supplement.pdf]

**Supplementary material**

**Detecting climatically driven phylogenetic and morphological  
divergence among global spruces (*Picea*)**

Guo-Hong Wang<sup>1\*</sup> & He Li<sup>1</sup>, Haiwei Zhao<sup>1, 2</sup>, Weikang Zhang<sup>1,3</sup>

**Supplement S1** Index of divergence (*D*) from the phylogeny-based and morphology-based SEEVA evaluation of spruce species.

**Table S1** Index of divergence (*D*) from the phylogeny-based SEEVA evaluation of spruce species worldwide.

**Table S2** Index of divergence (*D*) from the morphology-based SEEVA evaluation of spruce species worldwide.

**Table S1** Index of divergence ( $D$ ) from the phylogeny-based SEEVA evaluation of spruce species worldwide using elevation, four temperature variables (AMT: annual mean temperature; MTWM: max temperature of warmest month; MTCM: min temperature of coldest month; and TAR: temperature annual range) and four precipitation variables (AP: annual precipitation; PWM: precipitation of wettest month; PDM: precipitation of driest month; and PCQ: precipitation of coldest quarter).

| Phylogeny Node | Number of Samples |       | Index of Divergence ( $D$ ) |       |       |       |                         |       |       |       |       |
|----------------|-------------------|-------|-----------------------------|-------|-------|-------|-------------------------|-------|-------|-------|-------|
|                |                   |       | Temperature Variables       |       |       |       | Precipitation Variables |       |       |       |       |
|                | $N_a$             | $N_b$ | Elevation                   | AMT   | MTWM  | MTCM  | TAR                     | AP    | PWM   | PDM   | PCQ   |
| 1              | 1568              | 1820  | 0.25*                       | 0.02* | 0.15* | 0.08* | 0.26*                   | 0.09* | 0.16* | 0.20* | 0.05* |
| 2              | 1502              | 66    | 0.30*                       | 0.38* | 0.33* | 0.17* | 0.38*                   | 0.20* | 0.03  | 0.13* | 0.23* |
| 3              | 1497              | 5     | 0.69*                       | 0.45  | 0.49  | 0.35  | 0.55                    | 0.67* | 0.72* | 0.19  | 0.29  |
| 4              | 1438              | 59    | 0.64*                       | 0.12* | 0.32* | 0.27* | 0.68*                   | 0.31* | 0.77* | 0.26* | 0.06  |
| 5              | 1435              | 3     | 0.74                        | 0.66  | 0.47  | 0.44  | 0.89*                   | 0.69  | 0.78  | 0.24  | 0.51  |
| 6              | 1293              | 142   | 0.32*                       | 0.56* | 0.11* | 0.79* | 0.83*                   | 0.76* | 0.75* | 0.62* | 0.46* |
| 7              | 256               | 1037  | 0.56*                       | 0.12* | 0.45* | 0.77* | 0.87*                   | 0.45* | 0.34* | 0.99* | 1.00* |
| 8              | 200               | 56    | 0.68*                       | 0.12* | 0.04  | 0.03  | 0.07                    | 0.24* | 0.41* | 0.01  | 0.00  |
| 9              | 49                | 62    | 0.58*                       | 0.47* | 0.52* | 0.56* | 0.74*                   | 0.72* | 0.57* | 0.02* | 0.00  |
| 10             | 51                | 8     | 0.86*                       | 0.41  | 0.20  | 0.33  | 0.31                    | 0.02  | 0.02  | 0.30  | 0.32  |
| 11             | 35                | 31    | 0.14                        | 0.02  | 0.27  | 0.17  | 0.04                    | 0.22  | 0.15  | 0.59* | 0.26* |
| 12             | 29                | 6     | 0.18                        | 0.48  | 0.07  | 0.66* | 0.56                    | 0.55  | 0.71* | 0.00  | 0.05  |
| 13             | 6                 | 23    | 0.52                        | 0.34  | 0.08  | 0.80* | 1.00*                   | 0.80* | 1.00* | 0.81* | 0.08  |
| 14             | 1100              | 720   | 0.46*                       | 0.19* | 0.13* | 0.30* | 0.31*                   | 0.05* | 0.42* | 0.54* | 0.66* |
| 15             | 1089              | 11    | 0.33                        | 0.75* | 0.37* | 0.88* | 0.93*                   | 0.47* | 0.60* | 0.34  | 0.39* |
| 16             | 700               | 389   | 0.22*                       | 0.08* | 0.07* | 0.03* | 0.02*                   | 0.27* | 0.27* | 0.44* | 0.05* |
| 17             | 628               | 72    | 0.63*                       | 0.24* | 0.13* | 0.33* | 0.22*                   | 0.12* | 0.07* | 0.04* | 0.13* |
| 18             | 590               | 38    | 0.38*                       | 0.51* | 0.08* | 0.70* | 0.88*                   | 0.76* | 0.79* | 0.35* | 0.64* |
| 19             | 335               | 255   | 0.65*                       | 0.22* | 0.04  | 0.57* | 0.47*                   | 0.24* | 0.09* | 0.13* | 0.30* |
| 20             | 373               | 16    | 0.97*                       | 0.72* | 0.10  | 0.99* | 0.70*                   | 0.42* | 0.86* | 0.58* | 0.25  |
| 21             | 174               | 199   | 0.08*                       | 0.65* | 0.30* | 0.56* | 0.35*                   | 0.62* | 0.52* | 0.62* | 0.58* |
| 22             | 582               | 138   | 0.82*                       | 0.41* | 0.26* | 0.40* | 0.33*                   | 0.54* | 0.24* | 0.81* | 0.82* |
| 23             | 489               | 93    | 0.02                        | 0.42* | 0.37* | 0.66* | 0.73*                   | 0.87* | 0.38* | 1.00* | 0.99* |
| 24             | 285               | 204   | 0.01                        | 0.52* | 0.06* | 0.67* | 0.73*                   | 0.56* | 0.64* | 0.01  | 0.01  |
| 25             | 260               | 25    | 0.02                        | 0.04  | 0.53* | 0.03  | 0.26*                   | 0.42* | 0.42* | 0.14* | 0.63* |
| 26             | 248               | 12    | 0.45*                       | 0.16  | 0.82* | 0.20  | 0.17                    | 0.03  | 0.00  | 0.25* | 0.28* |
| 27             | 165               | 83    | 0.05*                       | 0.15* | 0.18* | 0.17* | 0.06                    | 0.16* | 0.00  | 0.03* | 0.01  |
| 28             | 161               | 4     | 0.00                        | 0.34  | 0.53  | 0.65  | 0.67                    | 0.95* | 0.17  | 0.99* | 0.99* |
| 29             | 11                | 72    | 0.07                        | 0.00  | 0.13  | 0.14  | 0.12                    | 0.10  | 0.09  | 0.06  | 0.01  |
| 30             | 78                | 126   | 0.01                        | 0.26* | 0.17* | 0.46* | 0.81*                   | 0.50* | 0.99* | 0.01  | 0.00  |
| 31             | 33                | 45    | 0.24*                       | 0.30* | 0.40* | 0.15  | 0.14                    | 0.13  | 0.07  | 0.04  | 0.01  |

Nodes correspond to those in Fig. 2. The number of samples for the two sister groups are indicated by  $N_a$  and  $N_b$ . \*

Indicates a significant difference between sister groups at  $P < 0.0016$  after Bonferroni correction.

**Table S2** Index of divergence ( $D$ ) from the morphology-based SEEVA evaluation of spruces worldwide using elevation, four temperature variables (AMT: annual mean temperature; MTWM: max temperature of warmest month; MTCM: min temperature of coldest month; and TAR: temperature annual range) and four precipitation variables (AP: annual precipitation; PWM: precipitation of wettest month; PDM: precipitation of driest month; and PCQ: precipitation of coldest quarter).

| Morphology<br>Node | Number of<br>Samples |       | Index of Divergence ( $D$ ) |                       |       |       |       |                         |       |       |       |
|--------------------|----------------------|-------|-----------------------------|-----------------------|-------|-------|-------|-------------------------|-------|-------|-------|
|                    | $N_a$                | $N_b$ | Elevation                   | Temperature Variables |       |       |       | Precipitation Variables |       |       |       |
|                    |                      |       |                             | AMT                   | MTWM  | MTCM  | TAR   | AP                      | PWM   | PDM   | PCQ   |
| 1                  | 2857                 | 531   | 0.30*                       | 0.17*                 | 0.05* | 0.18* | 0.18* | 0.16*                   | 0.54* | 0.32* | 0.36* |
| 2                  | 2530                 | 327   | 0.51*                       | 0.06*                 | 0.13* | 0.25* | 0.48* | 0.11*                   | 0.12* | 0.35* | 0.10* |
| 3                  | 2118                 | 412   | 0.08*                       | 0.10*                 | 0.30* | 0.22* | 0.36* | 0.14*                   | 0.10* | 0.25* | 0.12* |
| 4                  | 42                   | 2076  | 0.48*                       | 0.42*                 | 0.48* | 0.22* | 0.41* | 0.01                    | 0.26* | 0.25* | 0.04  |
| 5                  | 25                   | 17    | 0.46*                       | 0.04                  | 0.05  | 0.20  | 0.28  | 0.56*                   | 0.47* | 0.10  | 0.08  |
| 6                  | 5                    | 12    | 0.28                        | 0.39                  | 0.39  | 0.44  | 0.02  | 0.76                    | 0.14  | 1.00* | 1.00* |
| 7                  | 335                  | 1741  | 0.14*                       | 0.20*                 | 0.13* | 0.37* | 0.54* | 0.22*                   | 0.26* | 0.41* | 0.31* |
| 8                  | 378                  | 1363  | 0.21*                       | 0.17*                 | 0.10* | 0.46* | 0.49* | 0.22*                   | 0.46* | 0.32* | 0.30* |
| 9                  | 96                   | 282   | 0.42*                       | 0.94*                 | 0.57* | 0.98* | 1.00* | 0.97*                   | 0.53* | 0.98* | 0.98* |
| 10                 | 93                   | 3     | 0.71                        | 1.00*                 | 0.73  | 1.00* | 1.00* | 0.00                    | 0.00  | 0.05  | 0.90  |
| 11                 | 45                   | 237   | 0.43*                       | 0.72*                 | 0.10  | 0.71* | 0.65* | 0.16*                   | 0.52* | 0.04  | 0.05  |
| 12                 | 6                    | 231   | 0.41                        | 0.73*                 | 0.13  | 1.00* | 0.99* | 1.00*                   | 0.59  | 0.98* | 0.99* |
| 13                 | 89                   | 142   | 0.38*                       | 0.14*                 | 0.51* | 0.00  | 0.00  | 0.71*                   | 0.97* | 0.08* | 0.25* |
| 14                 | 1043                 | 320   | 0.93*                       | 0.08*                 | 0.37* | 0.69* | 0.81* | 0.74*                   | 0.44* | 0.98* | 0.95* |
| 15                 | 6                    | 1037  | 0.66*                       | 0.31                  | 0.47  | 0.29  | 0.85* | 0.59                    | 0.86* | 0.25  | 0.26  |
| 16                 | 244                  | 76    | 0.04                        | 0.76*                 | 0.08  | 0.84* | 0.83* | 0.91*                   | 0.83* | 0.16* | 0.13* |
| 17                 | 56                   | 188   | 0.65*                       | 0.18*                 | 0.28* | 0.04  | 0.00  | 0.05*                   | 0.91* | 0.00  | 0.00  |
| 18                 | 126                  | 62    | 0.03                        | 0.02                  | 0.17* | 0.14* | 0.70* | 0.01                    | 0.29* | 0.00  | 0.00  |
| 19                 | 27                   | 49    | 0.07                        | 0.31*                 | 0.63* | 0.66* | 0.40* | 0.01                    | 0.05  | 0.72* | 0.93* |
| 20                 | 11                   | 16    | 0.43                        | 0.00                  | 0.08  | 0.00  | 0.55* | 0.45                    | 0.16  | 0.08  | 0.14  |
| 21                 | 39                   | 373   | 0.35*                       | 0.17*                 | 0.01  | 0.46* | 0.39* | 0.34*                   | 0.13  | 0.49* | 0.06  |
| 22                 | 31                   | 8     | 0.78*                       | 0.40                  | 0.09  | 0.77* | 0.46  | 0.41                    | 0.77* | 0.32  | 0.35  |
| 23                 | 199                  | 174   | 0.08*                       | 0.65*                 | 0.30* | 0.56* | 0.35* | 0.62*                   | 0.52* | 0.62* | 0.58* |
| 24                 | 72                   | 255   | 0.28*                       | 0.09                  | 0.06  | 0.11* | 0.07* | 0.18*                   | 0.13* | 0.00  | 0.33* |
| 25                 | 283                  | 248   | 0.35*                       | 0.26*                 | 0.25* | 0.46* | 0.21* | 0.28*                   | 0.02* | 0.43* | 0.36* |
| 26                 | 89                   | 194   | 0.98*                       | 0.06                  | 0.21* | 0.12* | 0.32* | 0.65*                   | 0.21* | 0.78* | 0.70* |
| 27                 | 38                   | 51    | 0.93*                       | 0.60*                 | 0.14  | 0.82* | 0.95* | 0.16                    | 0.01  | 0.42* | 0.50* |
| 28                 | 33                   | 161   | 0.00                        | 0.31*                 | 0.03  | 0.33* | 0.43* | 0.09                    | 0.33* | 0.00  | 0.00  |
| 29                 | 11                   | 237   | 0.66*                       | 0.09                  | 0.32  | 0.30  | 0.04  | 0.07                    | 0.02  | 0.62* | 0.60* |
| 30                 | 23                   | 214   | 0.41*                       | 0.21                  | 0.13  | 0.01  | 0.26* | 0.47*                   | 0.93* | 1.00* | 0.70* |
| 31                 | 72                   | 142   | 0.70*                       | 0.26*                 | 0.11* | 0.15* | 0.13* | 0.45*                   | 0.13* | 0.66* | 1.00* |
| 32                 | 138                  | 4     | 1.00*                       | 0.59                  | 0.61  | 0.01  | 0.60  | 0.02                    | 0.00  | 0.01  | 1.00  |

Nodes correspond to those in Figure 3. The number of samples for the two sister groups are indicated by  $N_a$  and  $N_b$ .

\* Indicates a significant difference between sister groups at  $P < 0.0016$  after Bonferroni correction.
